# Supplementary material for: Designing a photocatalytic and self-renewed g-C3N4 nanosheet/poly-Schiff base composite coating towards long-term biofouling resistance
Source: Royal Society of Chemistry journal article supplement (doi:10.1039/d4mh00550c), 2024-01-01
Supplement: d4mh00550c1.pdf [file d4mh00550c1.pdf]

## Supporting Information

### **Designing photocatalytic and self-renewed g-C<sub>3</sub>N<sub>4</sub> nanosheets/ poly-Schiff base composite coating towards long-term biofouling resistance**

Saijun Wu,<sup>a,b</sup> Minglong Yan,<sup>a,\*</sup> Yinghao Wu,<sup>a</sup> Yangmin Wu,<sup>a</sup> Xijian Lan,<sup>a</sup> Jianjun Cheng,<sup>a</sup> Wenjie Zhao<sup>a,\*</sup>

<sup>a</sup> Key Laboratory of Advanced Marine Materials, Ningbo Institute of Materials Technology and Engineering, Chinese Academy of Sciences, Ningbo

<sup>b</sup> University of Chinese Academy of Sciences, Beijing, 100049, China

E-mail: [yanminglongvip@163.com](mailto:yanminglongvip@163.com) (M. Yan); [zhaowj@nimte.ac.cn](mailto:zhaowj@nimte.ac.cn) (W. Zhao)

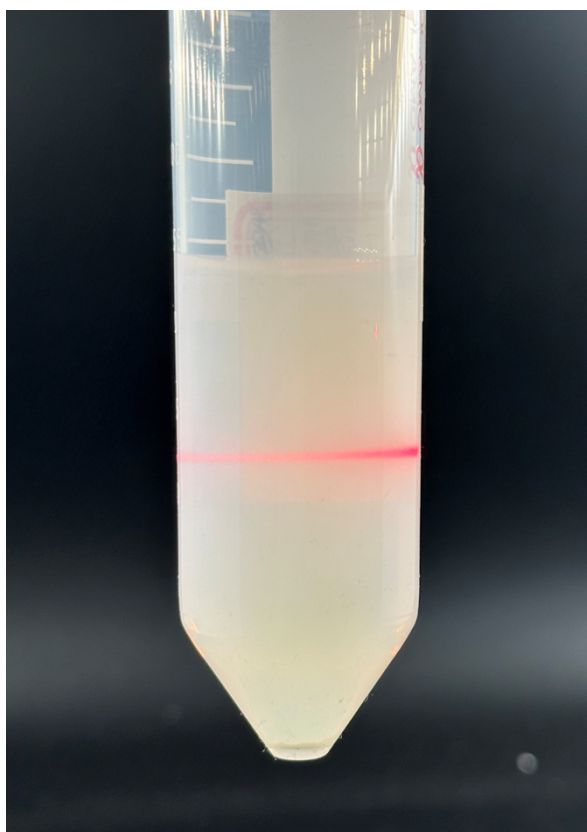

**Fig. S1.** Dispersed g-C-NS in IPA sit for more than five months.

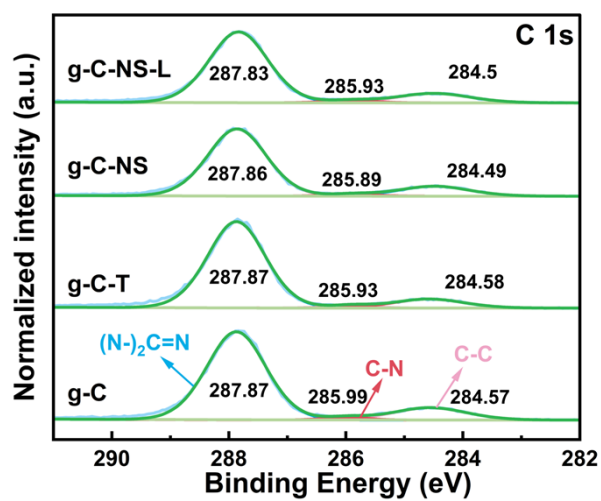

**Fig. S2.** C 1s XPS spectra for g-C, g-C-T, g-C-NS and g-C-NS-L.

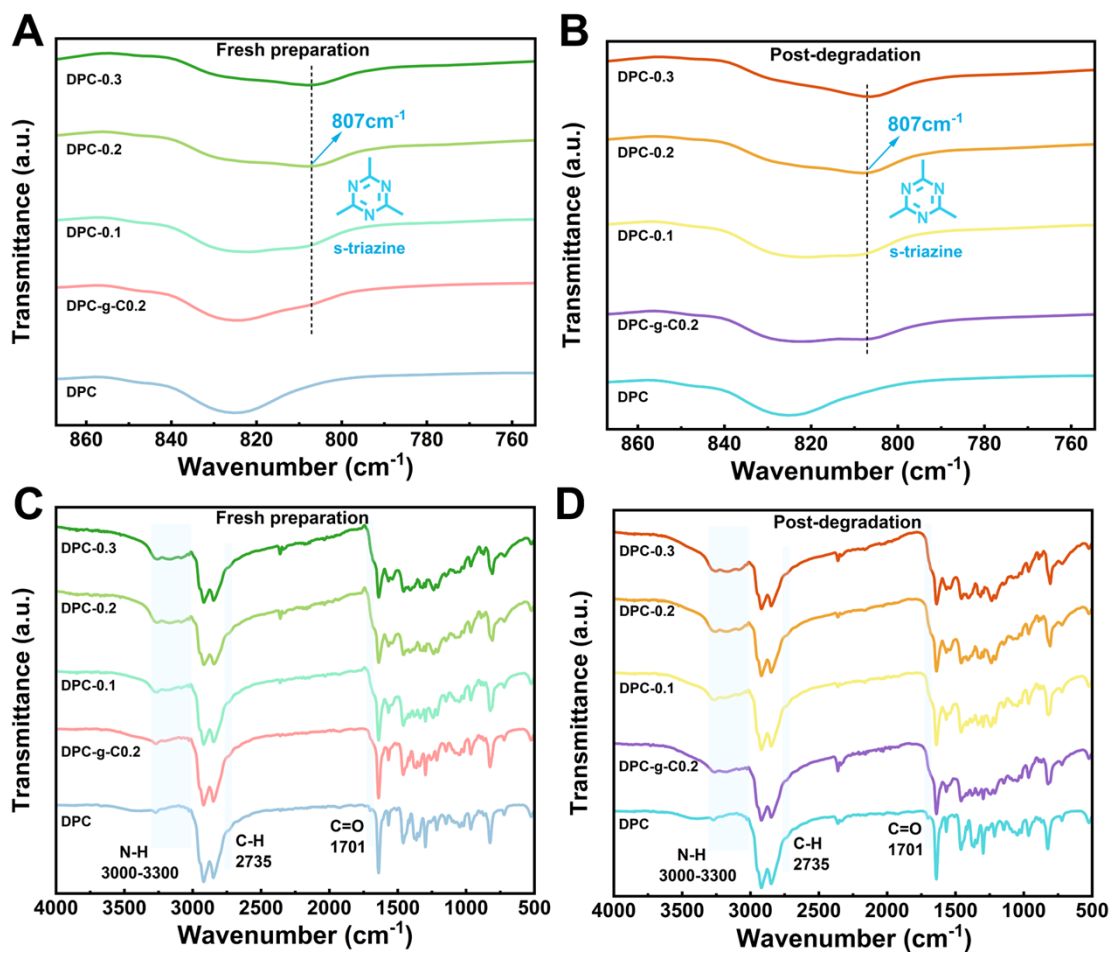

**Fig. S3.** FT-IR spectra of coatings before and after degradation.

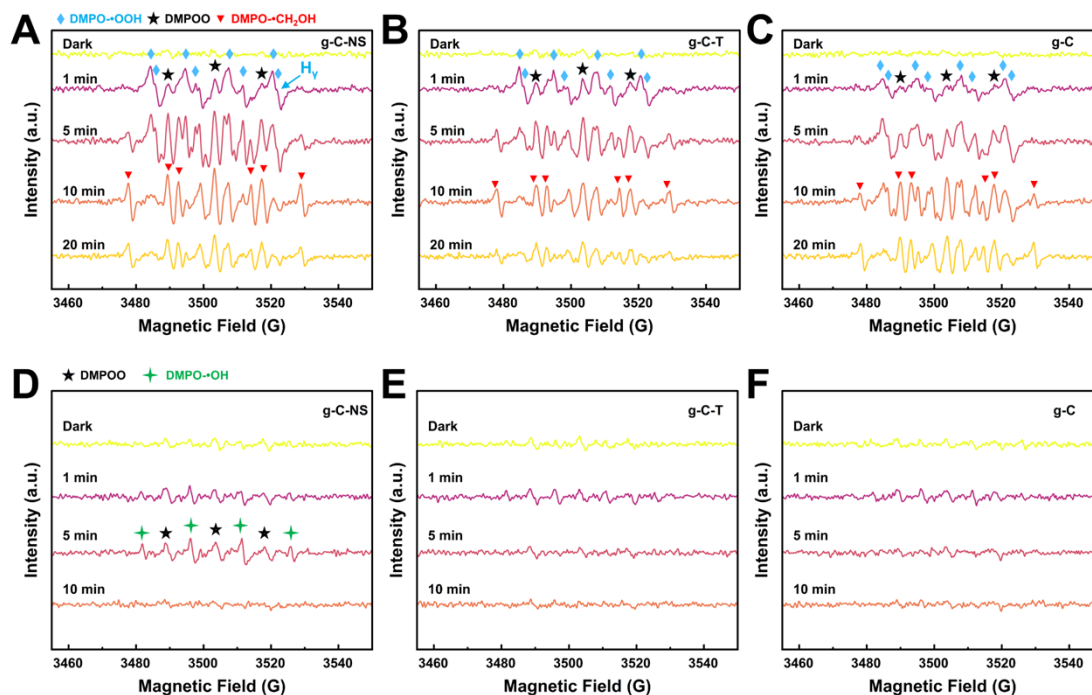

**Fig. S4.** EPR spectrum on visible light ( $\lambda > 420\text{nm}$ ) g-C, g-C-T and g-C-NS system captured by DMPO before and after irradiation: (A)-(C) signals captured in methanol solution; (D)-(F) signals captured in deionized water.

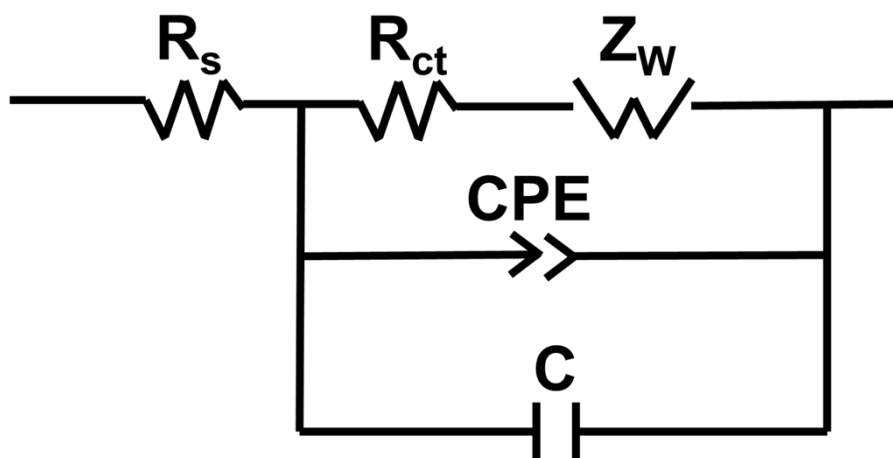

**Fig. S5.** Equivalent circuit diagram.

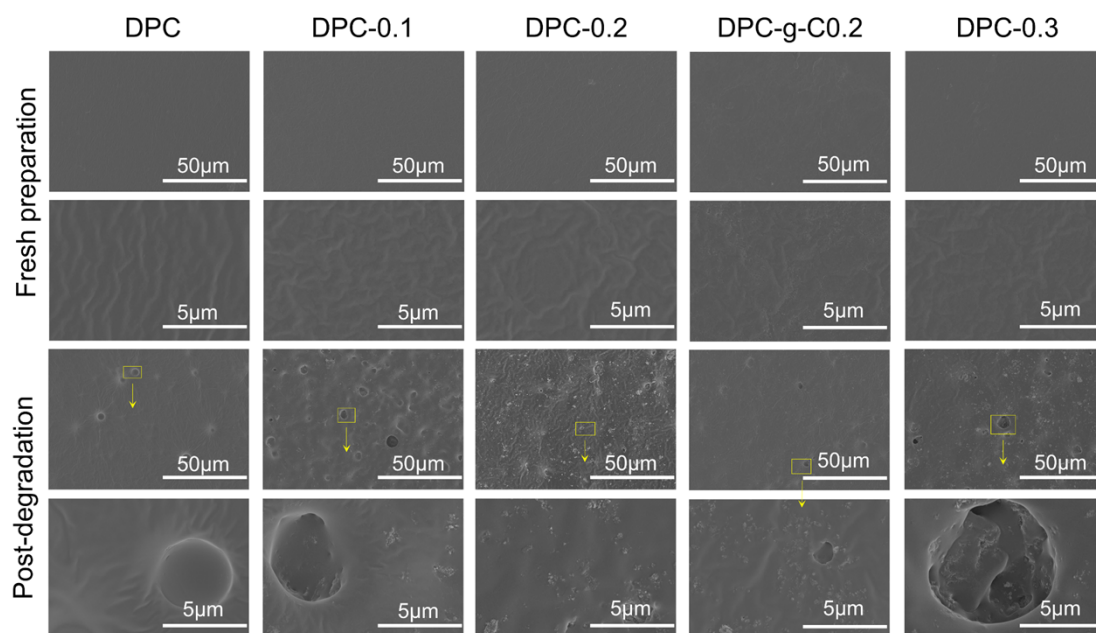

**Fig. S6.** Surface morphology of the coatings after immersion in deionized water for 5 days in the dark.

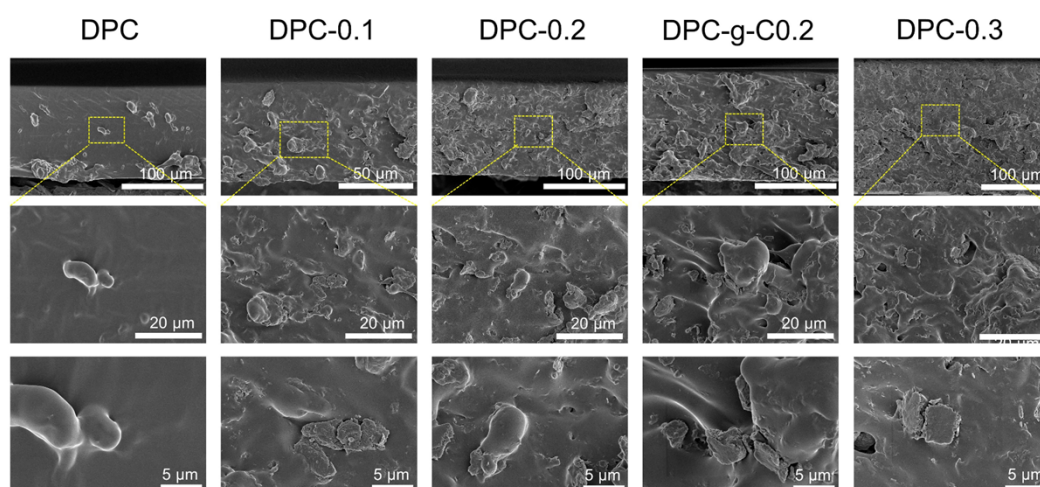

**Fig. S7.** Cross-sectional morphology of freshly prepared coatings.

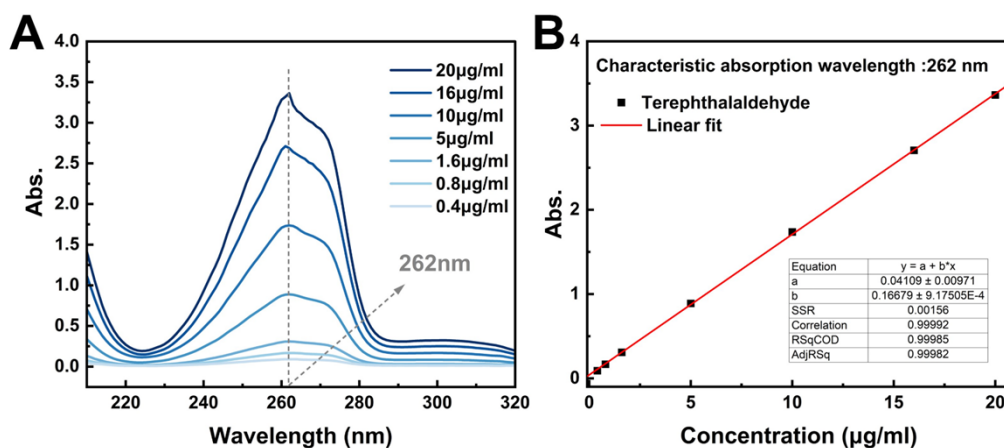

**Fig. S8.** Absorption spectra of TPA. (A) UV-Vis spectra of TPA solutions of different concentrations. (B) A linear fit of the maximum value of solution absorbance to the concentration of the solution.

A series of TPA solutions of different concentrations were configured and the absorbance at the maximum absorption wavelength was recorded. The Lambert-Beer law relates absorbance to solution thickness and solute concentration:

$$A = \lg \left( \frac{I_0}{I} \right) = abc$$

Where  $I_0$  is the intensity of incident monochromatic light,  $I$  is the intensity of transmitted light,  $a$  is the absorption coefficient. The absorbance  $A$  in dilute solution is proportional to the thickness  $b$  of liquid layer and the concentration  $c$  of solute. The corresponding calibration curve was done, the resulting equation was as follows:

$$[\text{TPA}] (\mu\text{g/ml}) = \text{Absorbance}/0.16679 (R^2 = 0.99982).$$

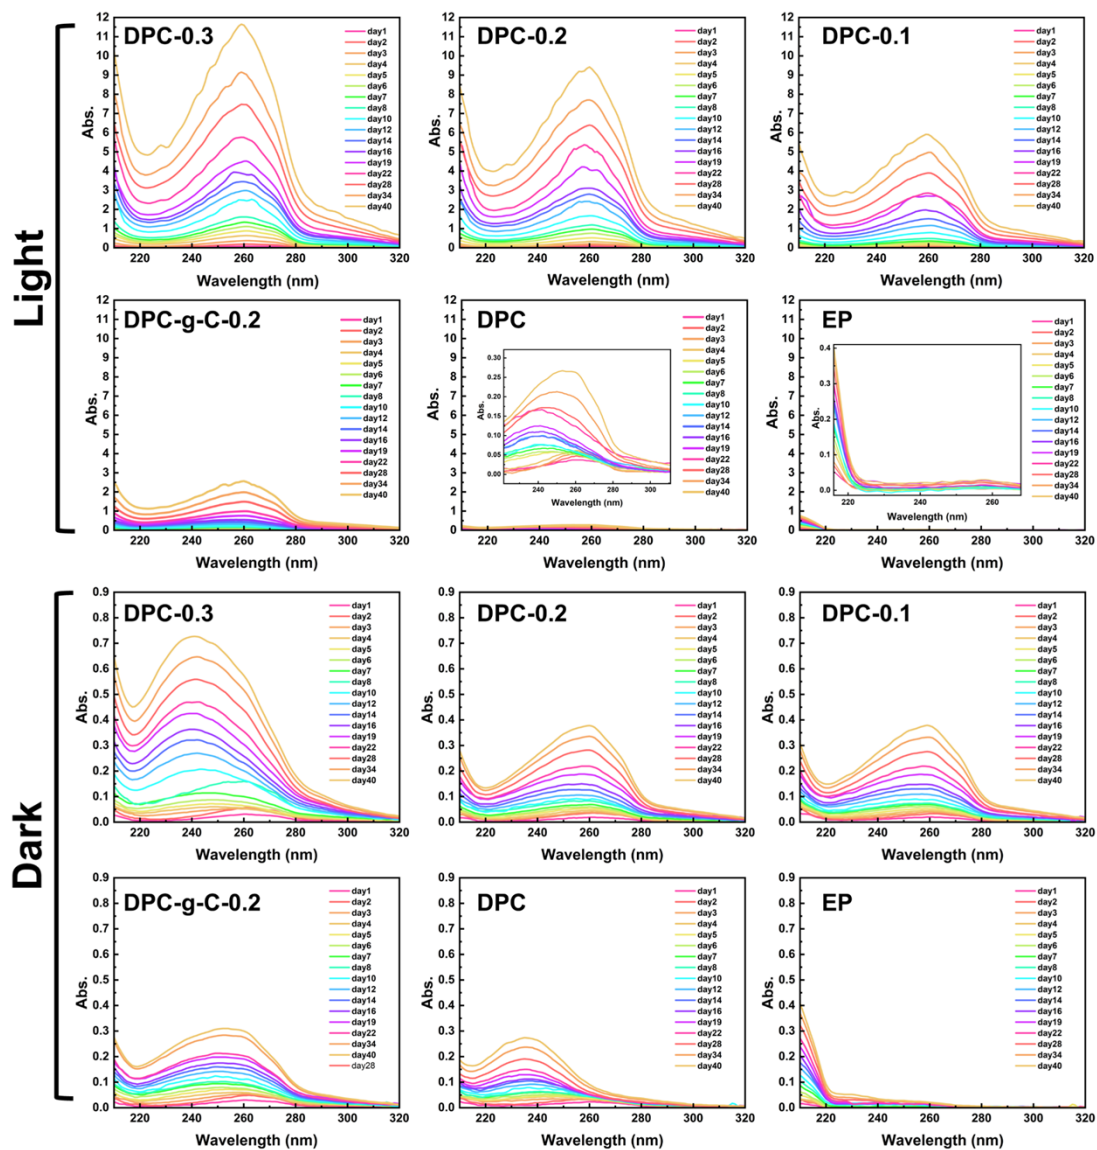

**Fig. S9.** Absorption spectra of coatings degradation solution in light/dark conditions at 293.15 K.



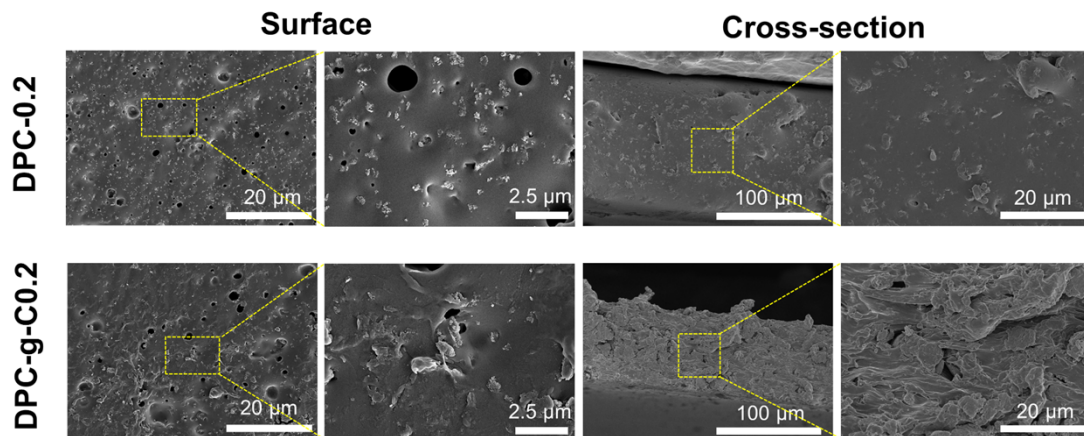

**Fig. S10.** SEM images of surface/cross-section of coatings after immersion in PBS solution for 12 h in visible light.

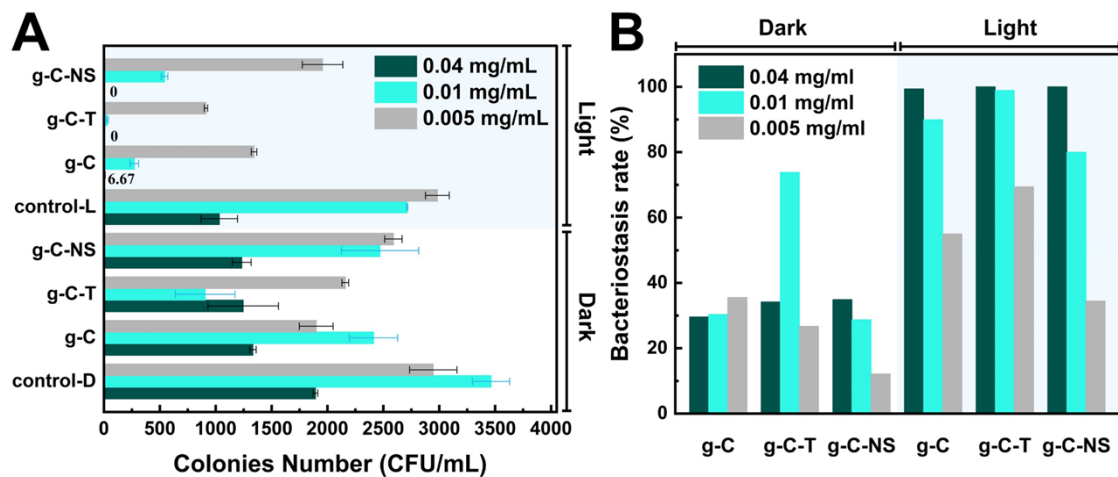

**Fig. S11.** (A) Concentration of surviving bacteria in photocatalyst suspensions. (B) Bacteriostasis rate of g-C, g-C-T and g-C-NS.



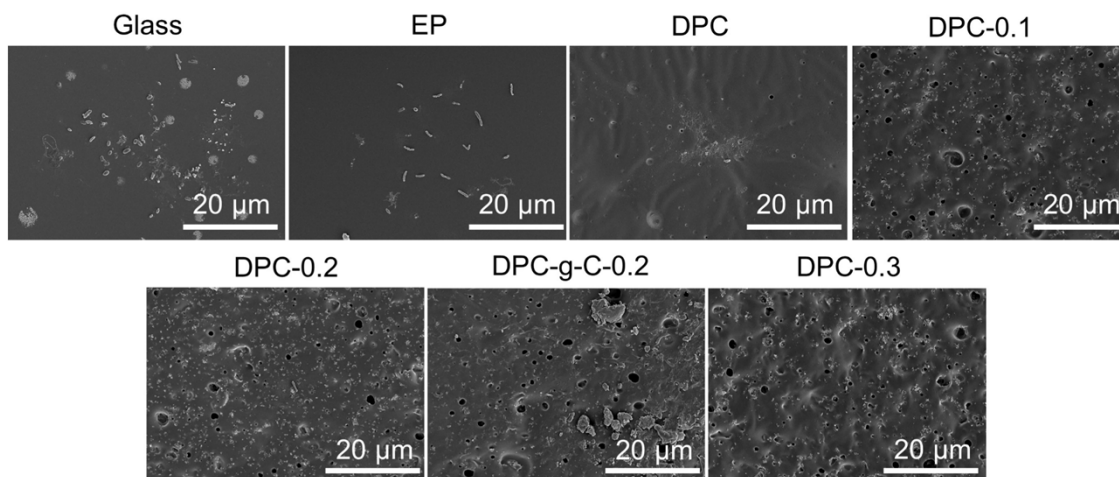

**Fig. S12.** Number of bacteria on the surface of glass and coatings after immersion in PBS solution for 12 h in visible light.

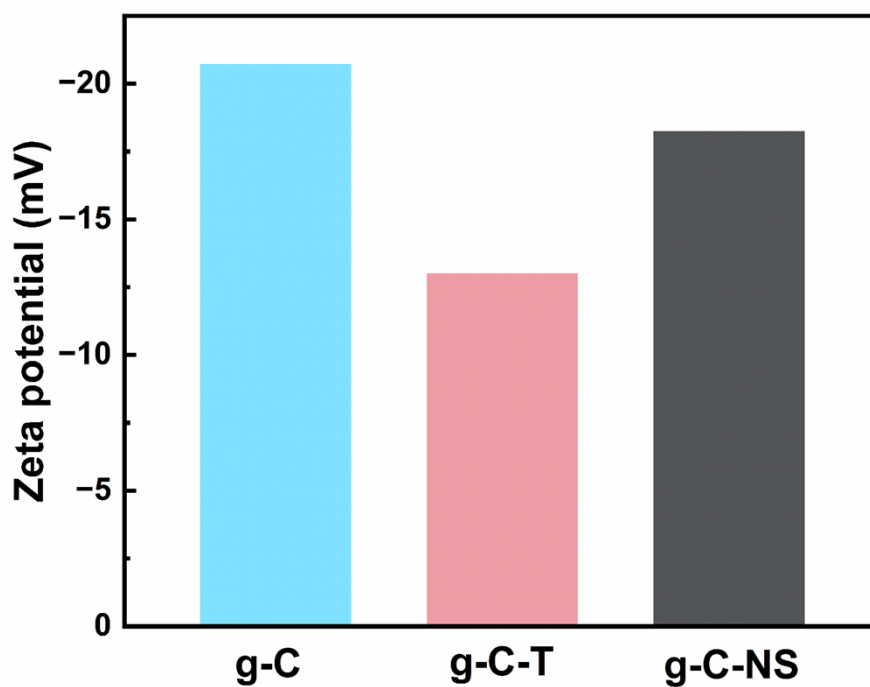

**Fig. S13.** Zeta potentials of g-C and g-C-NS in deionized water.

**Table S1.** Summarized XPS data for g-C, g-C-T, g-C-NS and g-C-NS-L.

| Samples  | Elements Content (at%) |        |       |
|----------|------------------------|--------|-------|
|          | C                      | N      | O     |
| g-C      | 47.291                 | 51.359 | 1.35  |
| g-C-T    | 47.619                 | 50.938 | 1.443 |
| g-C-NS   | 48.744                 | 50.186 | 1.069 |
| g-C-NS-L | 47.440                 | 50.486 | 2.075 |

| C 1s     | (N-)2C=N |        | C-N   |       | C-C    |        |
|----------|----------|--------|-------|-------|--------|--------|
|          | area     | a%     | area  | b%    | area   | c%     |
| g-C      | 12155.3  | 83.656 | 267.1 | 1.837 | 2109.8 |        |
| g-C-T    | 11611.1  | 87.043 | 253.0 | 1.895 | 14.507 |        |
| g-C-NS   | 6576.1   | 83.306 | 149.0 | 1.886 | 1476.8 | 11.061 |
| g-C-NS-L | 9739.1   | 83.898 | 255.0 | 2.196 | 1170.0 | 14.808 |
|          |          |        |       |       | 1615.8 | 13.907 |

| N 1s     | C-N=C(sp <sup>2</sup> ) |        | N-(C) <sub>3</sub> (sp <sup>2</sup> ) |        | C-NH <sub>x</sub> |       |
|----------|-------------------------|--------|---------------------------------------|--------|-------------------|-------|
|          | area                    | a%     | area                                  | b%     | area              | c%    |
| g-C      | 18832.4                 | 64.468 | 8378.8                                | 28.694 | 1995.9            | 6.838 |
| g-C-T    | 18289.7                 | 65.055 | 8775.7                                | 31.23  | 1043.5            | 3.715 |
| g-C-NS   | 8716.1                  | 55.610 | 6283.6                                | 40.104 | 671.2             | 4.286 |
| g-C-NS-L | 14743.4                 | 62.028 | 8106.5                                | 34.118 | 915.3             | 3.854 |

**Table S2.** Charge transfer resistance for photocatalysts.

| Samples | R <sub>ct</sub> (ohm) |
|---------|-----------------------|
| g-C     | 219                   |
| g-C-T   | 153.5                 |
| g-C-NS  | 123.6                 |

**Table S3.** Summarized XPS data for coatings before/after degradation (DPC, DPC-0.2/DPC (D), DPC-0.2 (D)).

| Samples     | Elements content (at%) |       |      |
|-------------|------------------------|-------|------|
|             | C                      | N     | O    |
| DPC         | 84.8                   | 8.31  | 6.9  |
| DPC (D)     | 77.7                   | 9.2   | 13.1 |
| DPC-0.2     | 87.88                  | 8.21  | 3.9  |
| DPC-0.2 (D) | 80.42                  | 10.77 | 8.81 |

| C 1s        | C-C     |      | C=C    |      | C=O    |      |
|-------------|---------|------|--------|------|--------|------|
|             | area    | a%   | area   | b%   | area   | c%   |
| DPC         | 13315.4 | 65   | 6392.2 | 31.2 | 778.7  | 3.8  |
| DPC (D)     | 8925.9  | 60.2 | 4379   | 29.5 | 1530.3 | 10.3 |
| DPC-0.2     | 16293.6 | 77.8 | 4062.6 | 19.4 | 596.9  | 2.8  |
| DPC-0.2 (D) | 9664.3  | 60.2 | 4684.7 | 29.2 | 1690.8 | 10.6 |

| N 1s        | C=N    |      | N-C    |      | NH <sub>2</sub> |      |
|-------------|--------|------|--------|------|-----------------|------|
|             | area   | a%   | area   | b%   | area            | c%   |
| DPC         | 1829.6 | 62.4 | 1153.5 | 27.3 | 297.6           | 10.3 |
| DPC (D)     | 924.3  | 34.9 | 1402   | 52.9 | 323.2           | 12.2 |
| DPC-0.2     | 2278.8 | 81.7 | 423.3  | 15.2 | 86              | 3.1  |
| DPC-0.2 (D) | 1680.1 | 47   | 1558.5 | 43.6 | 337.1           | 9.4  |

**Table S4.** Pseudo-first-order reaction linear fittings for coating degradation in the light/dark conditions.

| Linear fittings | $y = a + k*x$ (Light) |            |            |              |              |
|-----------------|-----------------------|------------|------------|--------------|--------------|
|                 | DPC-0.3               | DPC-0.2    | DPC-0.1    | DPC-g-C0.2   | DPC          |
| Intercept (a)   | -0.00399 ±            | -0.00406 ± | -0.00347 ± | -0.00158 ±   | 1.90342E-4 ± |
|                 | 7.9414E-4             | 6.95056E-4 | 6.28587E-4 | 4.45604E-4   | 2.87661E-5   |
| Slope (k)       | 0.00214 ±             | 0.00181 ±  | 0.00113 ±  | 4.41919E-4 ± | 4.0631E-5 ±  |
|                 | 4.63459E-5            | 4.05633E-5 | 3.66842E-5 | 2.60053E-5   | 1.67878E-6   |
| Correlation     | 0.99626               | 0.99599    | 0.99169    | 0.9734       | 0.98662      |
| RSqCOD          | 0.99253               | 0.992      | 0.98345    | 0.9475       | 0.97341      |
| AdjRSq          | 0.99207               | 0.9915     | 0.98241    | 0.94422      | 0.97175      |

| Linear fittings | $y = b + k * x$ (Dark) |              |              |              |              |
|-----------------|------------------------|--------------|--------------|--------------|--------------|
|                 | DPC-0.3                | DPC-0.2      | DPC-0.1      | DPC-g-C0.2   | DPC          |
| Intercept (b)   | 6.1592E-5 ±            | 3.31421E-5 ± | 3.1399E-5 ±  | 2.5753E-4 ±  | 9.59764E-5 ± |
|                 | 8.07839E-5             | 1.91641E-5   | 1.60513E-5   | 4.15773E-5   | 1.35215E-5   |
| Slope (k)       | 1.38564E-4 ±           | 6.80653E-5 ± | 6.77365E-5 ± | 5.40602E-5 ± | 4.60361E-5 ± |
|                 | 4.71453E-6             | 1.11842E-6   | 9.36751E-7   | 2.55521E-6   | 7.89111E-7   |
| Correlation     | 0.99087                | 0.99785      | 0.99847      | 0.98365      | 0.99766      |
| RSqCOD          | 0.98181                | 0.9957       | 0.99695      | 0.96758      | 0.99532      |
| AdjRSq          | 0.98068                | 0.99543      | 0.99676      | 0.96541      | 0.99503      |
